# Supplementary material for: ‘Honeycomb’ nanotube assembly based on thiacalix[4]arene derivatives by weak interactions
Source: Royal Society of Chemistry journal article supplement (doi:10.1039/c5ce01088h), 2015-01-01
Supplement: c5ce01088h1.pdf [file c5ce01088h1.pdf]

## Supporting Information

# **‘Honeycomb’ nanotube assembly based on thiacalix[4]arene derivatives by weak interactions**

**Wei Wang<sup>a</sup>, Weiping Yang<sup>a,b</sup>, Rong Guo<sup>a</sup> and Shuling Gong<sup>a,\*</sup>**

*<sup>a</sup> College of Chemistry and Molecular Sciences, Wuhan University, Wuhan 430072, PR China*

*<sup>b</sup> Key Laboratory of Tobacco Flavor Basic Research, Zhengzhou Tobacco Research Institute of CNTC, No. 2, Fengyang Street, High-Tech Zone, 450001 Zhengzhou, China*

*\*Corresponding Author: E-mail: gongsl@whu.edu.cn; Fax: +86 27 68754067; Tel: +86 27 68752701.*

## Contents

### Supporting figure

**Figure S1** The intermolecular C-H $\cdots$ S and S $\cdots$  $\pi$  interactions in crystals of **2**.

**Figure S2** Space filling view of the triply helical nanotube motif of five compounds.

**Figure S3** The C-H $\cdots$ O interactions found in the packing between neighbouring hexameric discs of **7** $\cdot$ CHCl<sub>3</sub>.

**Figure S4** The intermolecular C-H $\cdots$ O, C-H $\cdots$  $\pi$  and S $\cdots$  $\pi$  interactions in crystals of **8**.

**Figure S5** The intermolecular C-H $\cdots$ O, C-H $\cdots$  $\pi$  and S $\cdots$  $\pi$  interactions in crystals of **9a** and **9b** and the C-H $\cdots$ O interactions observed in neighbouring nanotubes of **9b**.

**Figure S6** Schematic of the structure of **10** and non-covalent interactions found in crystals of **10** $\cdot$ H<sub>2</sub>O.

**Figure S7** The intermolecular C-H $\cdots$ O, C-H $\cdots$  $\pi$  and S $\cdots$  $\pi$  interactions in crystals of **11**

**Figure S8** Schematic representations of Type I, Type II, and X<sub>3</sub> synthon halogen $\cdots$ halogen contacts.

**Figure S9** The intermolecular C-H $\cdots$ O, C-H $\cdots$  $\pi$ , and S $\cdots$  $\pi$  interactions in crystals of **12** $\cdot$ CHCl<sub>3</sub>

**Figure S10** <sup>1</sup>HNMR and ESI – MS of compound **7**

**Figure S11** <sup>1</sup>HNMR and ESI – MS of compound **12**

## Supporting table

**Table S1** Dihedral angles of aromatic rings and reference molecular plane R of the seven compounds.

**Table S2** Dihedral angles of the opposite aromatic rings of the seven compounds

**Table S3** S $\cdots\pi$  interactions for six compounds

**Table S4**  $\pi\cdots\pi$  interactions for five compounds

**Table S5** C-H $\cdots\pi$  interactions for six compounds

**Table S6** O $\cdots\pi$  interactions in compounds **9**, **10**·H<sub>2</sub>O and **11**

**Table S7** Hydrogen bonds of compound **7**·CHCl<sub>3</sub>

**Table S8** Hydrogen bonds of compound **8**

**Table S9** Hydrogen bonds of compound **9**

**Table S10** Hydrogen bonds of compound **10**·H<sub>2</sub>O

**Table S11** Hydrogen bonds of compound **11**

**Table S12** Hydrogen bonds of compound **12**·CHCl<sub>3</sub>

**Table S13** The Cl $\cdots$ Cl interactions of compound **12**·CHCl<sub>3</sub>

**Table S14** The cyano $\cdots$ Cl interactions of compound **12**·CHCl<sub>3</sub>

**Table S15** The Cl $\cdots\pi$  interactions of compound **12**·CHCl<sub>3</sub>

**Table S16** Sums of the van der Waals radii (vdW) of phenyl ring with common lp-containing atoms (atom LP).

**Table S17** The partial site occupation factors of four compounds.

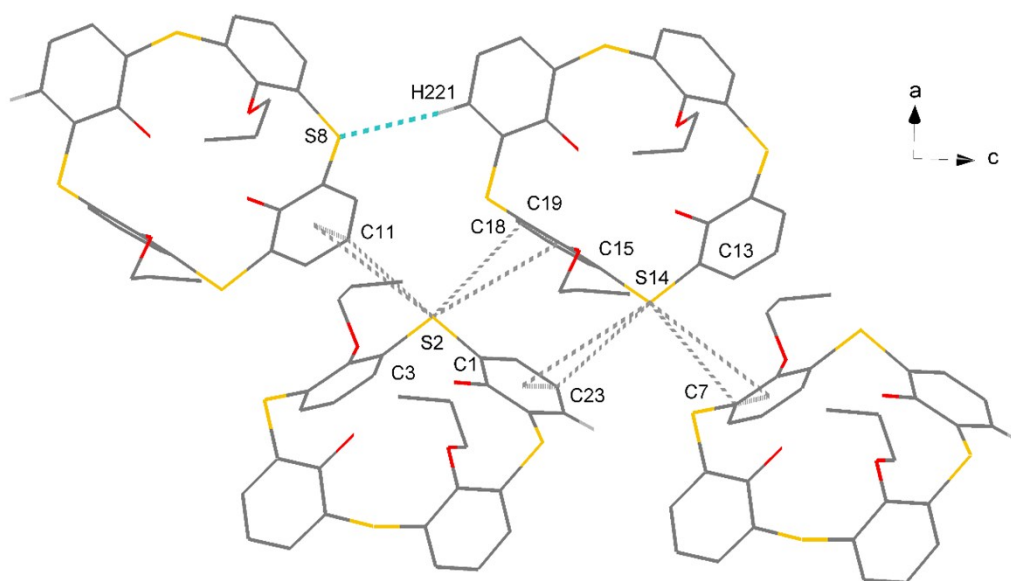

**Figure S1** The intermolecular C–H···S and S··· $\pi$  interactions in crystals of **2**. C–H···S and S··· $\pi$  interactions are aqua and gray dot lines, respectively. Hydrogen atoms (except for those involved in hydrogen bonding) are omitted for clarity.

| Atoms involved D–H···A | Symmetry  | H···A   | D···A    | $\angle(\text{DHA})$ |
|------------------------|-----------|---------|----------|----------------------|
| C(22) - H(221)···S(8)  | x, y, z+1 | 3.02(4) | 3.795(3) | 139(3)               |

| Compound | Typ | S···Cg        | Symmetry                          | $r/\text{\AA}$ | $d/\text{\AA}$ | $\alpha/\alpha'$ ( $^\circ$ ) | $\varphi$ ( $^\circ$ ) |               |       |
|----------|-----|---------------|-----------------------------------|----------------|----------------|-------------------------------|------------------------|---------------|-------|
| <b>2</b> | III | S(2)···Cg(2)  | $1/3+x-y,$<br>$1/3+x,$<br>$2/3-z$ | -              | 4.194          | C(11)                         | 3.463                  | 177.33//74.41 | 49.14 |
|          |     | S(2)···Cg(3)  | $1/3+x-y,$<br>$1/3+x,$<br>$5/3-z$ | -              | 4.104          | C(18)-C(19)                   | 3.650                  | 72.62/157.94  | 59.95 |
|          | III | S(14)···Cg(1) | $1/3+y, 2/3-x+y,$<br>$2/3-z$      |                | 4.250          | C(7)                          | 3.727                  | 75.15/156.22  | 58.92 |
|          |     | S(14)···Cg(4) | $1/3+y, 2/3-x+y,$<br>$5/3-z$      |                | 4.241          | C(23)                         | 3.546                  | 172.37/69.70  | 51.49 |

The parameter values of  $r$ ,  $d$ ,  $\alpha$ ,  $\alpha'$ , and  $\varphi$  lie in the allowable range of S··· $\pi$  interactions.<sup>S1</sup>

## Reference

S1 C. –Q. Wan, J. Han and C. W. M. Thomas, *New J. Chem.*, 2009, **33**, 707–712

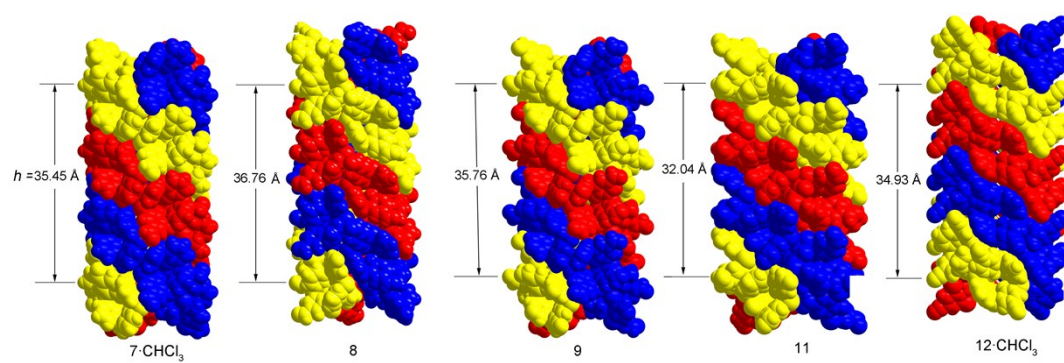

**Figure S2**

Space filling view of the triply helical nanotube motif are found in the crystal structure of five compounds. Side view showing helical nature of strands coloured yellow, red and blue. Other molecular components omitted for clarity.

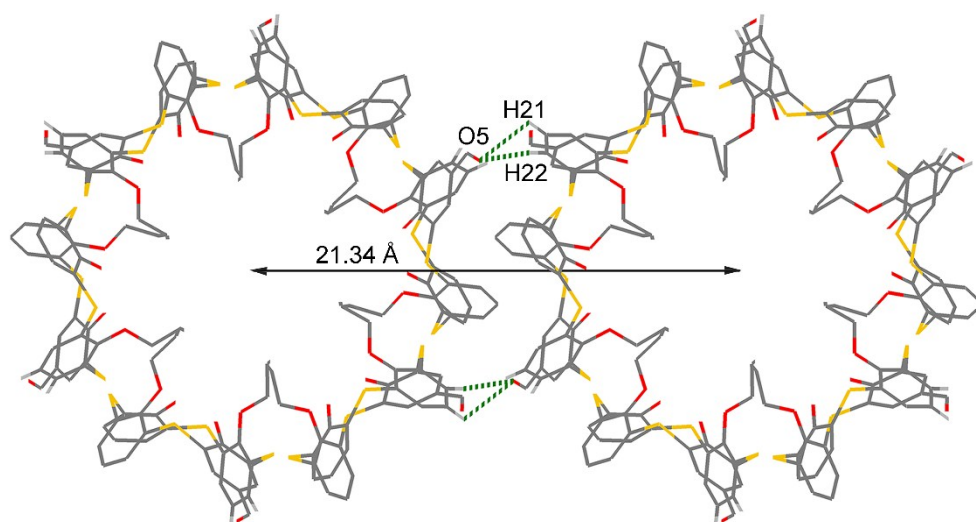

**Figure S3** The C-H···O interactions are found in the packing between neighbouring hexameric discs of  $7 \cdot \text{CHCl}_3$ . The green dotted lines represent C-H···O interactions. Hydrogen atoms (except for those involved in hydrogen bonding) and  $\text{CHCl}_3$  molecules not involved in omitted for clarity.

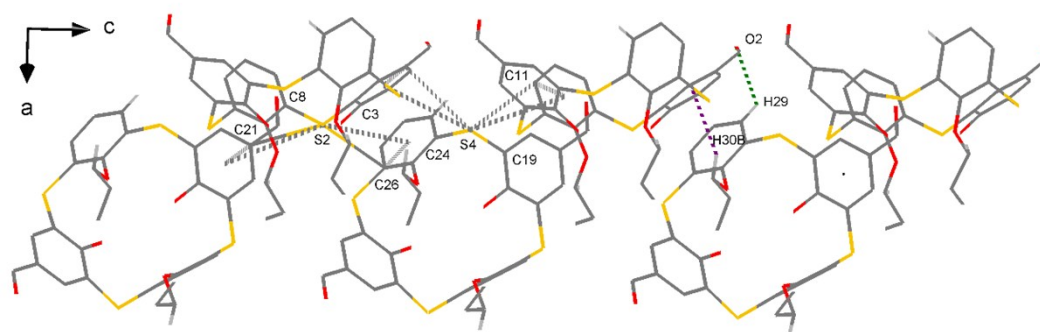

**Figure S4** View along the crystallographic *b* axis, the intermolecular C-H $\cdots$ O, C-H $\cdots$  $\pi$  and S $\cdots$  $\pi$  interactions are green, violet and gray dot lines, respectively, observed in the triply helical nanotubes of **8**. Hydrogen atoms (except for those involved in hydrogen bonding) are omitted for clarity.

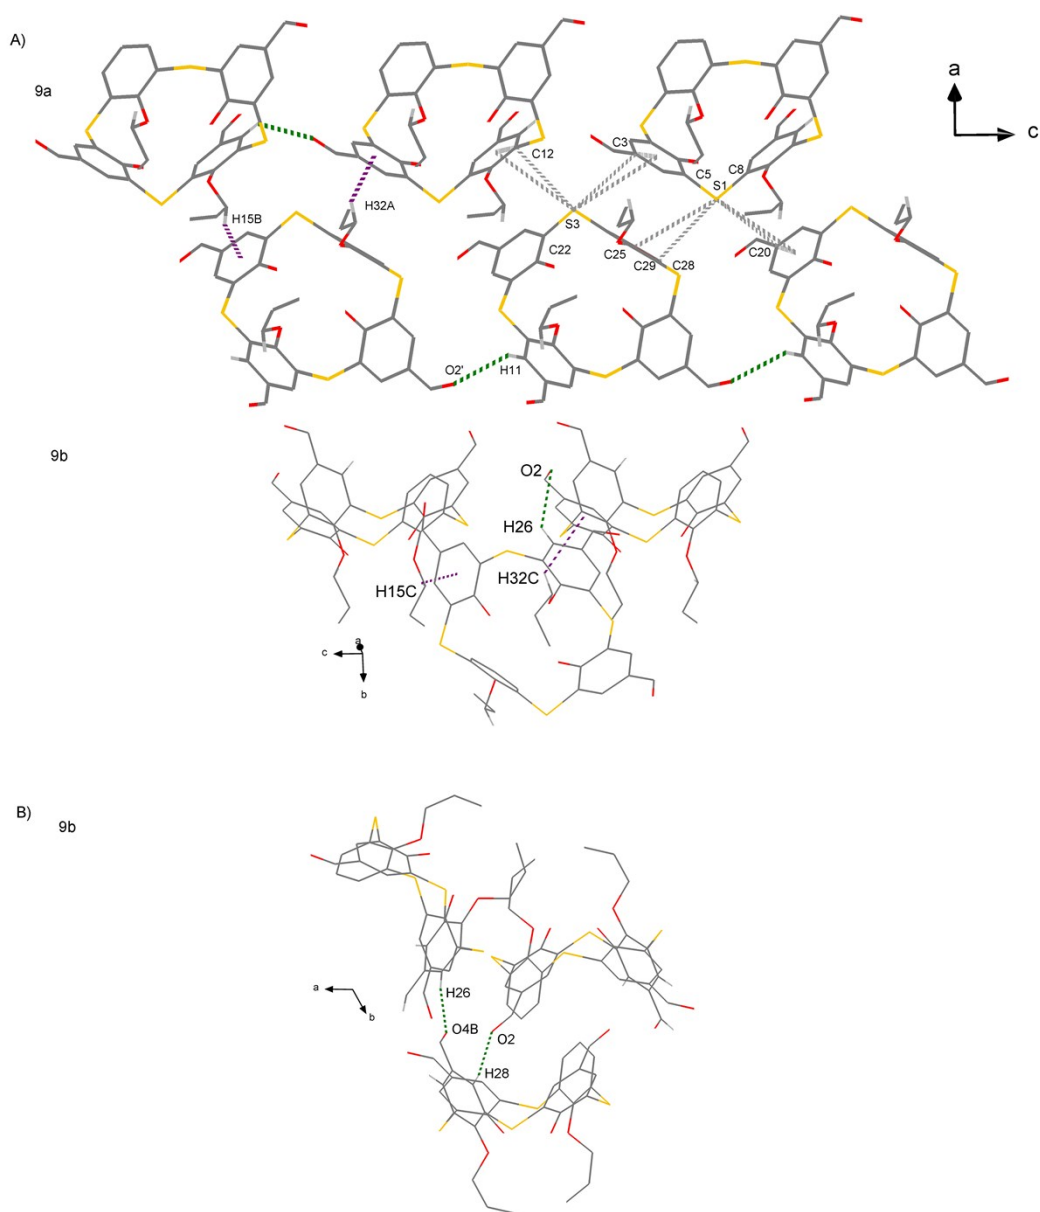

**Figure S5**

(A) View along the crystallographic *b* axis, the intermolecular C-H...O, C-H... $\pi$  and S... $\pi$  interactions are green, violet and gray dot lines, respectively, observed in the triply helical nanotubes of **9a** and **9b**.

(B) The C-H...O interactions observed in neighbouring nanotubes of **9b**. C-H...O interactions shown as dashed green lines.

Hydrogen atoms (except for those involved in hydrogen bonding) are omitted for clarity.



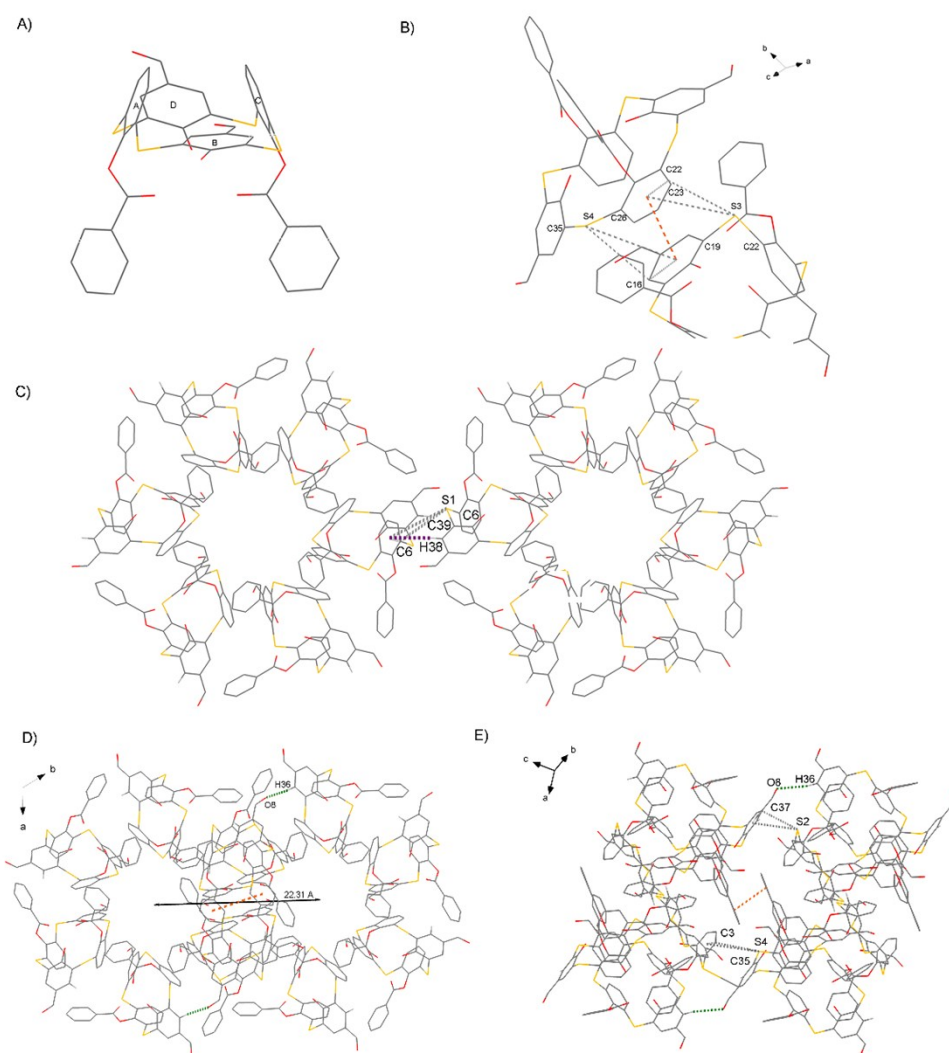

**Figure S6**

(A) Schematic of the structure of **10**.

(B) The S···π interactions and π···π interactions observed in hexameric disc.

(C) Non-covalent interactions the same layer neighbouring hexameric of **10·H<sub>2</sub>O** observed in 2D network.

(D) The different layer neighbouring hexameric of **10·H<sub>2</sub>O** observed in 3D network.

(E) Non-covalent interactions the adjacent layer neighbouring hexameric of **10·H<sub>2</sub>O** observed in 3D network.

C-H···O interactions, C-H···π interactions, and S···π interactions are green, violet and gray dot lines, respectively. Hydrogen atoms (except for those involved in hydrogen bonding) and H<sub>2</sub>O are omitted for clarity.

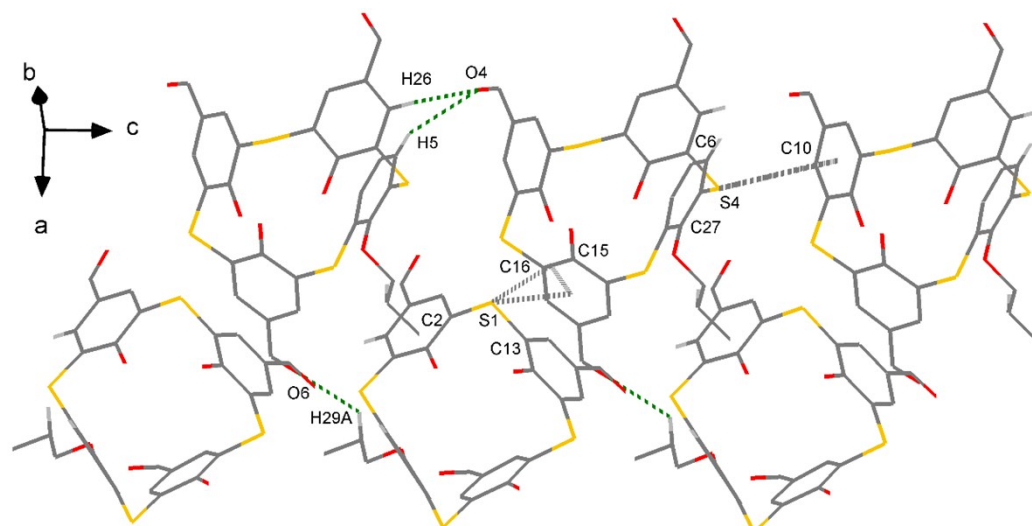

**Figure S7** View along the crystallographic *b* axis, the intermolecular C-H $\cdots$ O and S $\cdots$  $\pi$  interactions are green and gray dot lines, respectively, observed in the triply helical nanotubes of **11**. Hydrogen atoms (except for those involved in hydrogen bonding) are omitted for clarity

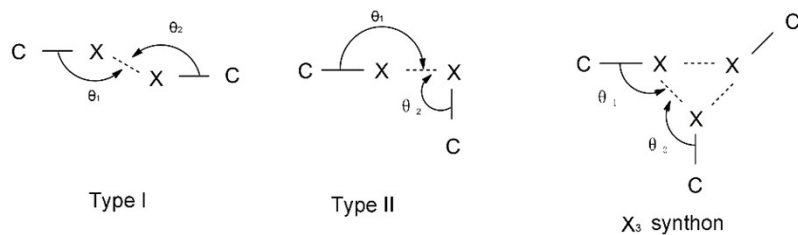

**Figure S8** Schematic representations of Type I, Type II, and X<sub>3</sub> synthon halogen···halogen contacts. The angles: Type I ( $\theta_1 = \theta_2 = 140\text{--}180^\circ$ ) and Type II ( $\theta_1 = 150\text{--}180^\circ$ ,  $\theta_2 = 90\text{--}120^\circ$ ). The X<sub>3</sub> synthon is a trigonal array of halogen atoms with attractive electrophile-nucleophile Type II contacts.

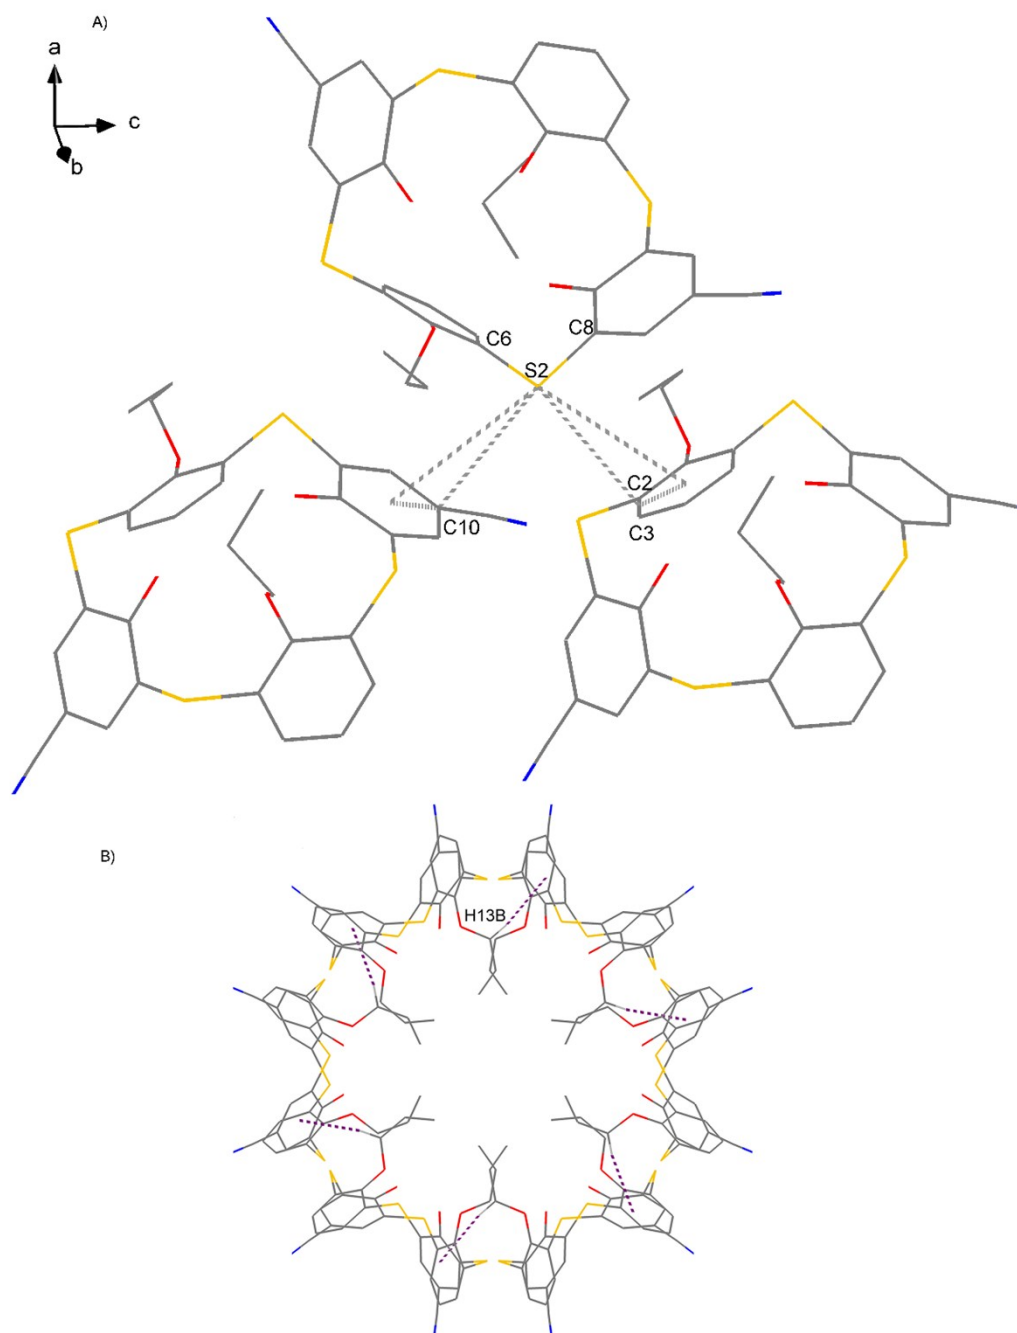

**Figure S9**

(A) The intermolecular  $\text{S} \cdots \pi$  interactions are gray dot lines observed in the triply helical nanotubes of  $12 \cdot \text{CHCl}_3$ .

(B) Structure of  $12 \cdot \text{CHCl}_3$  showing hexameric discs through the  $\text{C-H} \cdots \pi$  interactions.  $\text{C-H} \cdots \pi$  interactions shown as dashed orange lines.

Figure S10 <sup>1</sup>HNMR and ESI – MS of compound 7

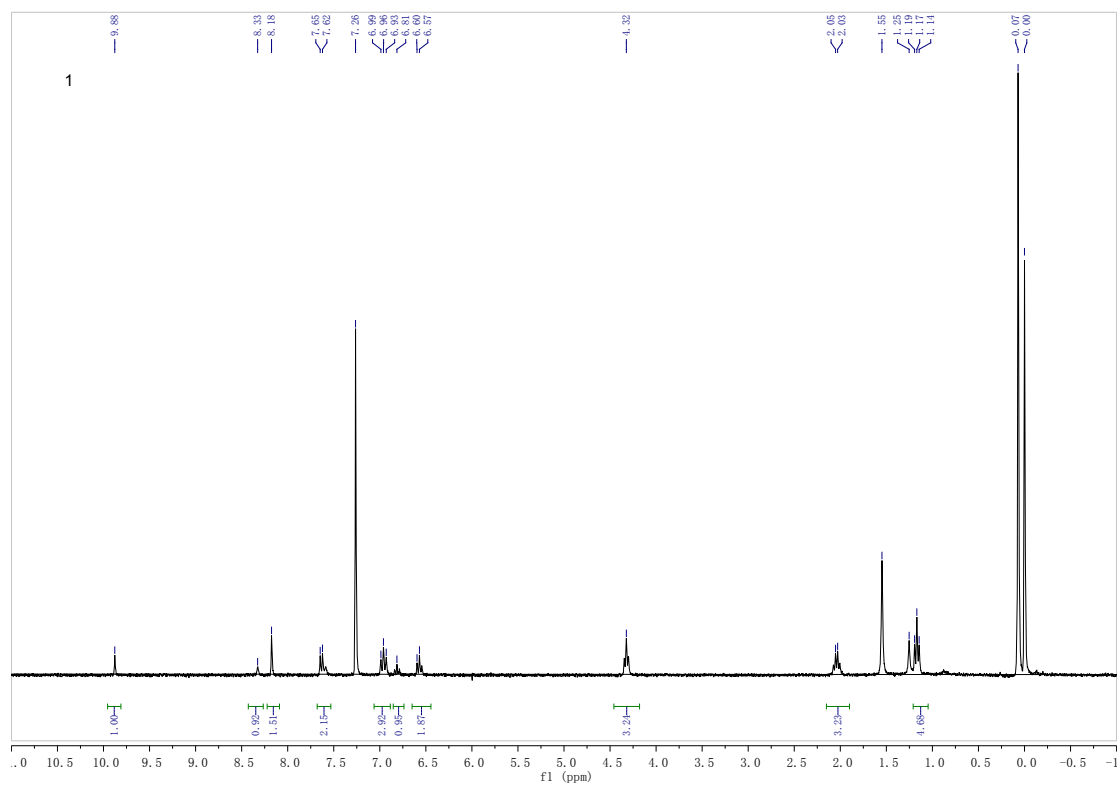

ESI-2015-N007-1 #137 RT: 4.11 AV: 1 NL: 4.36E6  
T: + c ESI Full ms [50.00-2000.00]

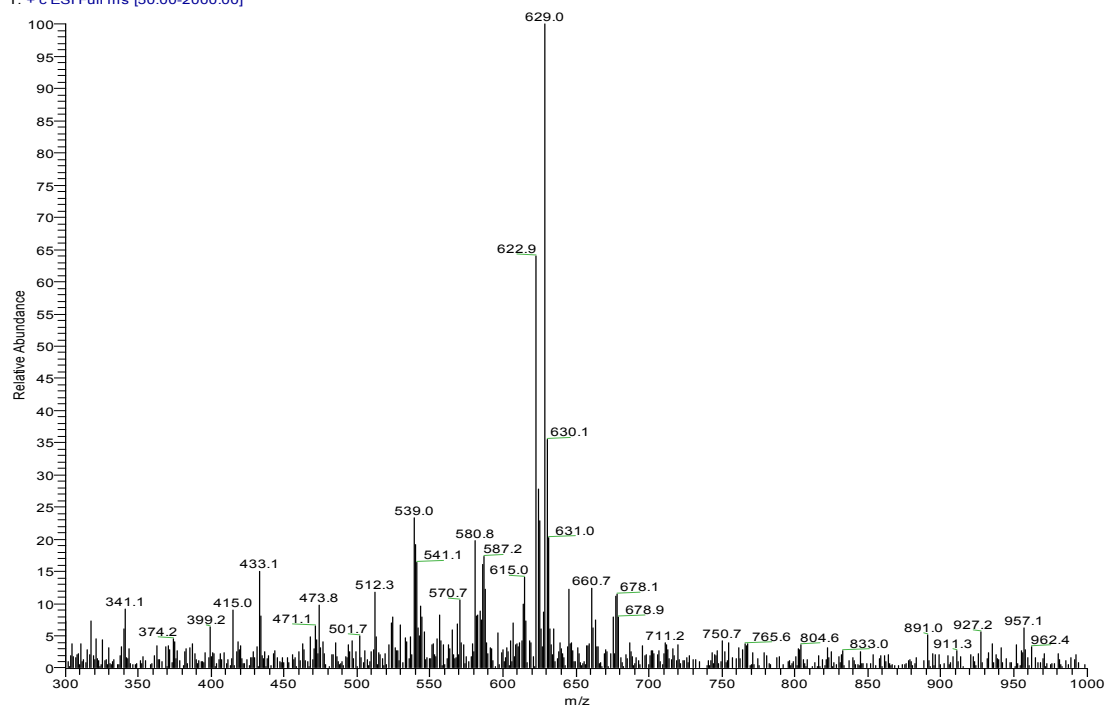

**Figure S11**  $^1\text{H}$ NMR and ESI – MS of compound **12**

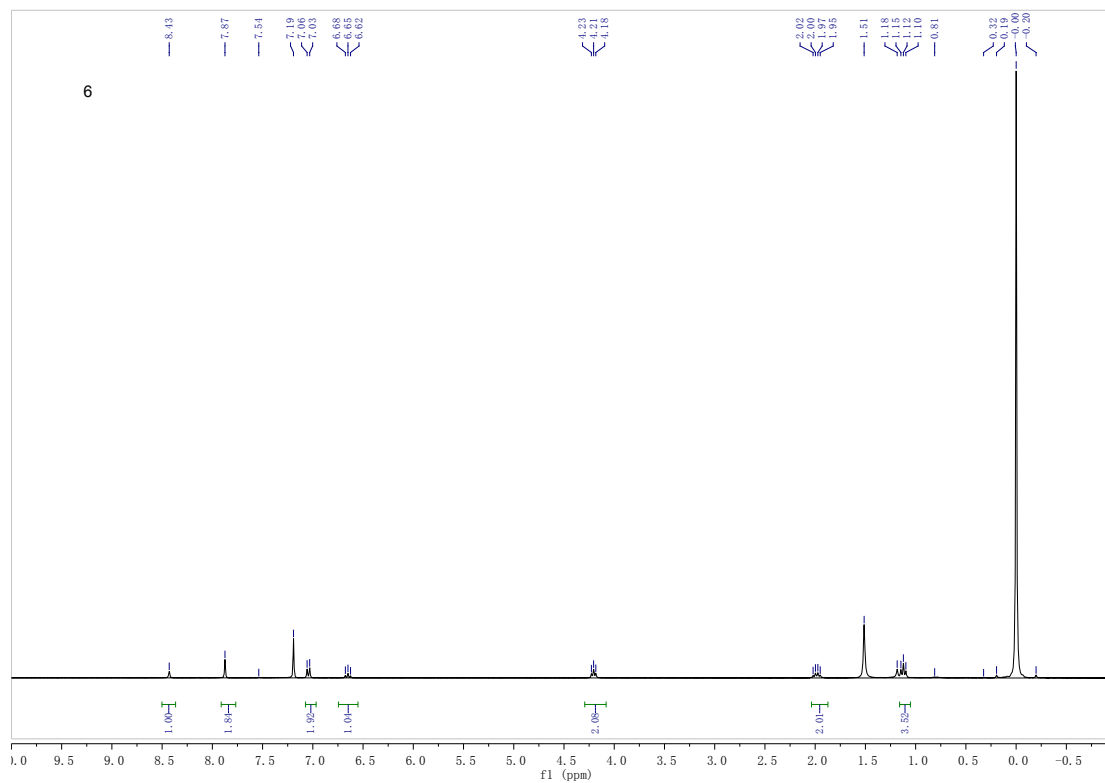

ESI-2015-N007-2 #11-13 RT: 0.35-0.40 AV: 3 NL: 3.37E5  
T: - c ESI Full ms [50.00-2000.00]

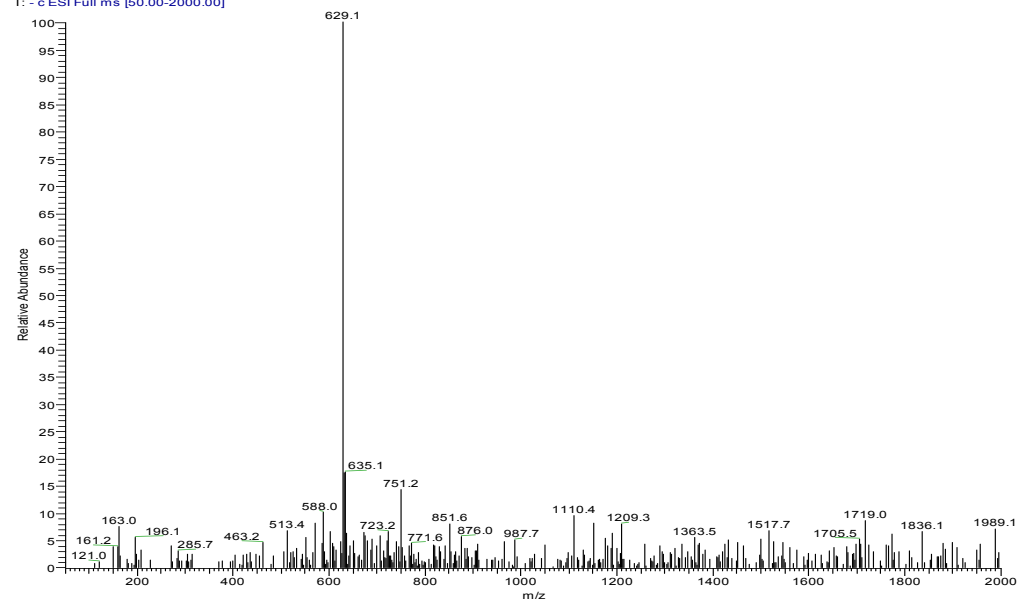

**Table S1** Dihedral angles of aromatic rings and reference molecular plane R of the seven compounds

| Compound                   | Plane AR (°) | Plane BR (°) | Plane CR (°) | Plane DR (°) |
|----------------------------|--------------|--------------|--------------|--------------|
| <b>2</b>                   | 70.34        | 35.71        | 71.19        | 30.57        |
| <b>7·CHCl<sub>3</sub></b>  | 71.09(68.14) | 33.52(30.60) | 73.51(76.51) | 37.89(38.77) |
| <b>8</b>                   | 77.15        | 32.69        | 65.91        | 44.37        |
| <b>9</b>                   | 75.11        | 43.26        | 69.95        | 38.63        |
| <b>10·H<sub>2</sub>O</b>   | 110.16       | 20.73        | 109.25       | 28.42        |
| <b>11</b>                  | 78.60(80.25) | 89.92(89.43) | 73.46(70.94) | 43.25(35.64) |
| <b>12·CHCl<sub>3</sub></b> | 68.73        | 43.97        | 68.73        | 43.97        |

( ) represents the disordered molecular

**Table S2** Dihedral angles of the opposite aromatic rings of the seven compounds

| Compound                   | Plane AC (°) | Plane BD (°)  |
|----------------------------|--------------|---------------|
| <b>2</b>                   | 38.48        | 113.72        |
| <b>7·CHCl<sub>3</sub></b>  | 35.40        | 109.6(110.63) |
| <b>8</b>                   | 36.96        | 102.97        |
| <b>9</b>                   | 34.97        | 98.10         |
| <b>10·H<sub>2</sub>O</b>   | 39.42        | 130.59        |
| <b>11</b>                  | 27.98(29.39) | 46.84(52.80)  |
| <b>12·CHCl<sub>3</sub></b> | 42.54        | 92.06         |

( ) represents the disordered molecular

**Table S3** The three types of S $\cdots\pi$  interactions in compounds **7-12** and their metric parameters

| Compound                   | Type     | S $\cdots$ Cg                                                                      | Symmetry                   | $r / \text{\AA}$ | $d / \text{\AA}$ | $\alpha / \alpha'(^{\circ})$ | $\varphi (^{\circ})$ |       |
|----------------------------|----------|------------------------------------------------------------------------------------|----------------------------|------------------|------------------|------------------------------|----------------------|-------|
|                            |          | 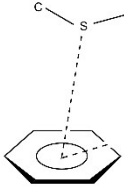  |                            |                  |                  |                              |                      |       |
|                            |          |   |                            |                  |                  |                              |                      |       |
|                            |          |  |                            |                  |                  |                              |                      |       |
|                            | Type I   |                                                                                    |                            |                  |                  |                              |                      |       |
|                            | Type II  |                                                                                    |                            |                  |                  |                              |                      |       |
|                            | Type III |                                                                                    |                            |                  |                  |                              |                      |       |
| <b>7·CHCl<sub>3</sub></b>  | III      | S(2) $\cdots$ Cg(1)                                                                | 1/3+x-y, -1/3+x,<br>2/3-z  | 4.357            | C(6)             | 3.820                        | 74.72/154.99         | 58.52 |
|                            |          | S(2) $\cdots$ Cg(4)                                                                | 1/3+x-y, -1/3+x,<br>5/3-z  | 4.150            | C(30)            | 3.599                        | 168.48/71.26         | 57.52 |
|                            | III      | S(4) $\cdots$ Cg(2)                                                                | 1/3+y, 2/3-x+y,<br>2/3-z   | 4.193            | C(14)            | 3.536                        | 76.30/177.34         | 53.13 |
|                            |          | S(4) $\cdots$ Cg(3)                                                                | 1/3+y, 2/3-x+y,<br>5/3-z   | 4.127            | C(19) -<br>C(20) | 3.742                        | 159.21/72.13         | 63.21 |
| <b>8</b>                   | III      | S(2) $\cdots$ Cg(3)                                                                | 1+y, 1-x+y, 2-z            | 4.495            | C(21)            | 3.701                        | 165.26/61.41         | 47.79 |
|                            |          | S(2) $\cdots$ Cg(4)                                                                | 1+y, 1-x+y, 1-z            | 4.216            | C(26)            | 3.675                        | 77.09/163.53         | 58.16 |
|                            | III      | S(4) $\cdots$ Cg(1)                                                                | x-y, -1+x, 1-z             | 4.258            | C(5)             | 3.658                        | 75.23/170.75         | 55.75 |
|                            |          | S(4) $\cdots$ Cg(2)                                                                | x-y, -1+x, 2-z             | 4.174            | C(11)            | 3.572                        | 163.49/67.04         | 55.17 |
| <b>9</b>                   | III      | S(1) $\cdots$ Cg(3)                                                                | 1/3+y, 2/3-x+y,<br>-1/3-z  | 4.152            | C(20)            | 3.739                        | 175.33/74.07         | 63.31 |
|                            |          | S(1) $\cdots$ Cg(4)                                                                | 1/3+y, 2/3-x+y,<br>2/3-z   | 4.149            | C(28) -<br>C(29) | 3.684                        | 69.63/159.33         | 59.29 |
|                            | III      | S(3) $\cdots$ Cg(1)                                                                | 1/3+x-y, -1/3+x,<br>2/3-z  | 4.252            | C(3)             | 3.645                        | 167.27/67.43         | 55.43 |
|                            |          | S(3) $\cdots$ Cg(2)                                                                | 1/3+x-y, -1/3+x,<br>-1/3-z | 4.167            | C(12)            | 3.696                        | 74.92/160.11         | 60.88 |
| <b>10·H<sub>2</sub>O</b>   | II       | S(1) $\cdots$ Cg(1)                                                                | 1-x, -y, -z                | 4.753            | C(5)             | 3.775                        | 118.0/83.91          | 38.51 |
|                            | II       | S(2) $\cdots$ Cg(6)                                                                | 4/3-x+y, -2/3-x,<br>-1/3+z | 4.254            | C(36) -<br>C(37) | 3.588                        | 102.66/87.08         | 49.43 |
|                            | II       | S(3) $\cdots$ Cg(4)                                                                | 1+y, 1-x+y, -z             | 4.082            | C(22) -<br>C(23) | 3.661                        | 62.1/134.74          | 61.71 |
|                            | III      | S(4) $\cdots$ Cg(1)                                                                | 2/3-y, -2/3+x-y,<br>-1/3+z | 4.891            | C(3)             | 3.884                        | 167.86/92.13         | 37.31 |
|                            |          | S(4) $\cdots$ Cg(3)                                                                | x-y, -1+x-y, -z            | 4.106            | C(16)            | 3.664                        | 58.79/135.44         | 62.44 |
| <b>11</b>                  | II       | S(1) $\cdots$ Cg(3)                                                                | y, 1-x+y, 1-z              | 3.979            | C(15) -<br>C(16) | 3.551                        | 164.08/75.55         | 60.77 |
|                            | I        | S(3) $\cdots$ Cg(1)                                                                | 1+x-y, x, 2-z              | 3.620            | C(5)             | 3.394                        | 129.52/104.0         | 69.57 |
|                            | II       | S(4) $\cdots$ Cg(2)                                                                | x, y, 1+z                  | 4.260            | C(10)            | 3.376                        | 111.79/124.14        | 42.87 |
| <b>12·CHCl<sub>3</sub></b> | III      | S(2) $\cdots$ Cg(1)                                                                | -x+y, y, 1/2+z             | 3.946            | C(2)-C(3)        | 3.566                        | 161.62/76.81         | 62.95 |
|                            |          | S(2) $\cdots$ Cg(2)                                                                | y, -x+y, 2-z               | 4.215            | C(10)            | 3.778                        | 71.82/173.38         | 62.38 |



**Table S4**  $\pi \cdots \pi$  interactions for five compounds

| Compound                  | Cg(I) $\cdots$ Cg(J) | Symmetry             | $\alpha$ | Cg $\cdots$ Cg | Cg(I)_Perp | Cg(J)_Perp |
|---------------------------|----------------------|----------------------|----------|----------------|------------|------------|
| <b>7·CHCl<sub>3</sub></b> | Cg(1) $\cdots$ Cg(1) | 1-x,-y,1-z           | 0        | 4.050(3)       | 3.446(2)   | 3.447(2)   |
| <b>8</b>                  | Cg(4) $\cdots$ Cg(4) | -x+5/3,-y+1/3,-z+4/3 | 0        | 4.047(2)       | 3.468(1)   | 3.468(1)   |
| <b>9</b>                  | Cg(2) $\cdots$ Cg(2) | -x+1, -y, -z         | 0        | 4.708(3)       | 3.431(2)   | 3.431(2)   |
| <b>10·H<sub>2</sub>O</b>  | Cg(3) $\cdots$ Cg(4) | 1+y,1-x-y,-z         | 0        | 3.725(3)       | 28.216(5)  | 3.513(2)   |
|                           | Cg(5) $\cdots$ Cg(5) | 5/3-x,1/3-y,1/3-z    | 0        | 4.801(5)       | -3.323(3)  | -3.323(3)  |
| <b>11</b>                 | Cg(4) $\cdots$ Cg(4) | -x+4/3,-y+5/3,-z+5/3 | 0        | 4.300(4)       | -3.509(2)  | -3.509(2)  |

**Table S5** C-H $\cdots\pi$  interactions for six compounds

| Compound                   | Atoms involved C-H $\cdots$ Cg | Symmetry               | H $\cdots$ Cg | C $\cdots$ Cg | <C-H $\cdots$ Cg |
|----------------------------|--------------------------------|------------------------|---------------|---------------|------------------|
| <b>7·CHCl<sub>3</sub></b>  | C(3) - H(3) $\cdots$ Cg(2)     | 1-x, -y, 1-z           | 3.183         | 4.064(4)      | 154.8            |
|                            | C(4) - H(4A) $\cdots$ Cg(3)    | 1-x, -y, 1-z           | 3.179         | 3.818(4)      | 126.1            |
|                            | C(5) - H(5) $\cdots$ Cg(4)     | 1-x, -y, 1-z           | 3.123         | 4.007(1)      | 155.8            |
|                            | C(7) - H(7A) $\cdots$ Cg(2)    | 1/3+y, 2/3-x+y, 2/3-z  | 2.77          | 3.520(7)      | 132.6            |
|                            | C(23) - H(23A) $\cdots$ Cg(4)  | 1/3+x-y, -1/3+x, 5/3-z | 2.93          | 3.790(10)     | 136.1            |
|                            | C(23) - H(23A) $\cdots$ Cg(5)  | 1/3+x-y, -1/3+x, 5/3-z | 2.93          | 3.43(3)       | 134.0            |
|                            | C(13) - H(13) $\cdots$ Cg(1)   | 1/3+y, 2/3-x+y, 2/3-z  | 3,138         | 3.603(4)      | 112.0            |
| <b>8</b>                   | C(30) - H(30) $\cdots$ Cg(1)   | x-y, x-1, -z+1         | 2.66          | 3.438(4)      | 136              |
| <b>9</b>                   | C(15') - H(15B) $\cdots$ Cg(3) | 1/3+y, 2/3-x+y, -1/3-z | 2.96          | 3.89(3)       | 161              |
|                            | C(32') - H(32A) $\cdots$ Cg(1) | 1/3+x-y, -1/3+x, 2/3-z | 2.92          | 3.77(5)       | 147              |
|                            | C(15) - H(15C) $\cdots$ Cg(3)  | 1/3+y, 2/3-x+y, -1/3-z | 2.90          | 3.64(2)       | 134              |
|                            | C(32) - H(32C) $\cdots$ Cg(1)  | 1/3+x-y, -1/3+x, 2/3-z | 2.96          | 3.61(2)       | 126              |
| <b>10·H<sub>2</sub>O</b>   | C(38) - H(38) $\cdots$ Cg(1)   | 1-x, -y, 1-z           | 3.113         | 4.041(5)      | 175.9            |
| <b>11</b>                  | C(24) - H(24) $\cdots$ Cg(1)   | -x+4/3, -y+5/3, -z+5/3 | 2.65          | 3.476(9)      | 148              |
|                            | C(25) - H(25) $\cdots$ Cg(2)   | -x+4/3, -y+5/3, -z+5/3 | 2.90          | 3.442(6)      | 118              |
|                            | C(25') - H(25') $\cdots$ Cg(2) | -x+4/3, -y+5/3, -z+5/3 | 2.80          | 3.526(12)     | 136              |
| <b>12·CHCl<sub>3</sub></b> | C(13) - H(13B) $\cdots$ Cg(2)  | -x+ y, y, -1/2+z       | 2.84          | 3.682(6)      | 146.6            |

**Table S6** O $\cdots\pi$  interactions in compounds **9**, **10**·H<sub>2</sub>O and **11**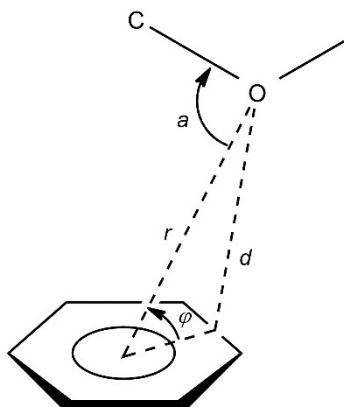

| Compound                    | C–O (C=O) $\cdots$ Cg        | Symmetry      | $r/\text{\AA}$ | $d/\text{\AA}$ | $\alpha(^{\circ})$ | $\phi(^{\circ})$ |       |
|-----------------------------|------------------------------|---------------|----------------|----------------|--------------------|------------------|-------|
| <b>9</b>                    | C(14) - O(4) $\cdots$ Cg(2)  | 1-x, -y, -z   | 3.469(14)      | C(12)          | 3.469              | 80.1             | 78.46 |
|                             | C(14) - O(4) $\cdots$ Cg(3)  | 1-x, -y, -z   | 3.443(13)      | C(23)          | 2.972              | 154.6            | 58.84 |
|                             | C(14) - O(4) $\cdots$ Cg(4)  | 1-x, -y, -z   | 3.213(15)      | C(25) - C(26)  | 3.147              | 102.0            | 76.13 |
|                             | C(14) - O(4A) $\cdots$ Cg(1) | 1-x, -y, -z   | 3.121(19)      | C(6)           | 2.821              | 155.7            | 64.67 |
|                             | C(14) - O(4A) $\cdots$ Cg(2) | 1-x, -y, -z   | 3.558(19)      | C(8)           | 3.441              | 75.40            | 73.90 |
|                             | C(14) - O(4A) $\cdots$ Cg(4) | 1-x, -y, -z   | 3.24(2)        | C(28) - C(29)  | 3.175              | 100.15           | 76.28 |
| <b>10</b> ·H <sub>2</sub> O | C(40) - O(8) $\cdots$ Cg(1)  | 1-x, -y, -z   | 3.832(4)       | C(1) - C(2)    | 3.416              | 131.6            | 60.91 |
| <b>11</b>                   | C(13) - O(3) $\cdots$ Cg(3)  | y, 1-x+y, 1-z | 3.598(2)       | C(17) - C(18)  | 3.197              | 84.55            | 60.93 |

**Table S7** Hydrogen bonds of compound **7·CHCl<sub>3</sub>**

| Atoms involved D-H···A | Symmetry                | H···A    | D···A     | <(DHA)  |
|------------------------|-------------------------|----------|-----------|---------|
| C(24) - H(24A)···Cl(1) |                         | 2.86(5)  | 3.76(3)   | 134(3)  |
| C(25) - H(25B)···Cl(2) |                         | 2.99(9)  | 4.053(9)  | 167(6)  |
| C(7) - H(7B)···S(1)    |                         | 3.02(5)  | 3.520(5)  | 112(3)  |
| C(31) - H(31)···S(1)   | x, y, 1+z               | 2.97(5)  | 3.757(5)  | 141(4)  |
| C(31') - H(31)···S(1)  | x, y, 1+z               | 2.97(5)  | 3.757(5)  | 119(3)  |
| C(23) - H(23A)···S(2)  |                         | 3.03(5)  | 3.572(6)  | 116(3)  |
| C(7) - H(7B)···S(2)    | y+1/3, -x+y+2/3, -z+2/3 | 3.02(6)  | 3.890(4)  | 146(4)  |
| C(23) - H(23B)···S(3)  |                         | 2.83(10) | 3.569(7)  | 140(7)  |
| C(23) - H(23B)···S(3') |                         | 2.18(11) | 2.92(4)   | 138(7)  |
| C(20) - H(20)···O(5)   | x, y, 1+z               | 2.64(7)  | 3.263(6)  | 127(5)  |
| C(21) - H(21)···O(5)   | 4/3-x+y, 2/3-x, 2/3+z   | 2.47(5)  | 3.128(5)  | 121(4)  |
| C(22) - H(22)···O(5)   | 4/3-x+y, 2/3-x, 2/3+z   | 2.60(4)  | 3.046(5)  | 106(3)  |
| O(2) - H(2)···S(1)     |                         | 2.68(8)  | 3.077(3)  | 114(6)  |
| O(4) - H(4)···S(3)     |                         | 2.43(13) | 3.071(6)  | 114(8)  |
| O(4) - H(4)···S(3')    |                         | 1.96(14) | 2.794(10) | 127(9)  |
| O(4') - H(4)···S(3)    |                         | 2.43(13) | 3.38(13)  | 140(13) |
| O(4') - H(4)···S(3')   |                         | 1.96(14) | 3.01(11)  | 151(13) |
| O(2) - H(2)···O(1)     |                         | 2.01(10) | 2.758(4)  | 167(8)  |
| O(4) - H(4)···O(3)     |                         | 1.81(14) | 2.834(10) | 147(10) |
| O(4') - H(4)···O(3)    |                         | 1.81(14) | 2.67(4)   | 128(11) |

**Table S8** Hydrogen bonds of compound **8**

| Atoms involved D-H...A | Symmetry                | H...A   | D...A    | <(DHA)   |
|------------------------|-------------------------|---------|----------|----------|
| C(30) - H(30B)...S(2)  | x-y, x-1, -z+1          | 3.05(3) | 3.845(4) | 138.8(6) |
| C(30) - H(30A)...S(4)  |                         | 2.95(1) | 3.453(4) | 112.5(3) |
| C(12) - H(12)...O(2)   | 4/3-y, x-y-1/3, z+2/3   | 2.59(3) | 3.388(4) | 141.4(1) |
| C(13) - H(13)...O(2)   | -x+y+5/3, -x+4/3, z+1/3 | 2.46(6) | 3.266(4) | 142.5(2) |
| C(29) - H(29)...O(2)   | x-y, x-1, -z+1          | 2.87(1) | 3.269(4) | 106.4(2) |
| C(6) - H(6)...O(5)     | -x+5/3, -y+1/3, -z+4/3  | 2.52(2) | 3.399(4) | 154.3(2) |
| C(7) - H(7)...O(5)     | -x+5/3, -y+1/3, -z+4/3  | 2.58(3) | 3.444(5) | 150.8(1) |
| C(11) - H(11)...O(5)   | -x+5/3, -y+1/3, -z+7/3  | 2.39(3) | 3.176(4) | 139.4(2) |
| O(1) - H(1A)...S(2)    |                         | 2.64(3) | 3.058(2) | 114(3)   |
| O(1B) - H(1B)...S(4)   |                         | 2.61(3) | 3.098(2) | 120(3)   |
| O(1) - H(1A)...O(3)    |                         | 2.01(2) | 2.781(3) | 162(4)   |
| O(4) - H(4A)...S4      |                         | 1.93(2) | 2.707(3) | 157(3)   |

**Table S9** Hydrogen bonds of compound **9**

| Atoms involved D-H...A | Symmetry                | H...A    | D...A     | <(DHA)  |
|------------------------|-------------------------|----------|-----------|---------|
| C(15) - H(15C)···S(1)  |                         | 2.71(13) | 3.25(6)   | 119(8)  |
| C(15') - H(15C)···S(1) |                         | 2.71(13) | 3.58(4)   | 134(8)  |
| C(2) - H(2)···S(2)     | x, y, z+1               | 3.09(7)  | 3.909(5)  | 139(5)  |
| C(15') - H(15D)···S(2) |                         | 3.03(7)  | 3.52(2)   | 117(5)  |
| C(15) - H(15D)···S(3)  | y+1/3, -x+y+2/3, -z-1/3 | 3.00(10) | 4.05(5)   | 152(3)  |
| C(15') - H(15D)···S(3) | y+1/3, -x+y+2/3, -z-1/3 | 3.00(10) | 3.90(2)   | 162(5)  |
| C(32) - H(32C)···S(3)  |                         | 2.90(15) | 3.51(2)   | 117(11) |
| C(32) - H(32D)···S(4)  |                         | 3.01(10) | 3.57(3)   | 112(8)  |
| C(19) - H(19)···O(2)   | -x+1, -y, -z            | 2.54(7)  | 3.421(9)  | 150 (4) |
| C(24) - H(24)···O(2)   | -x+1, -y, -z            | 2.79(15) | 3.464(13) | 133(12) |
| C(26) - H(26)···O(2)   | x-y+1/3, x-1/3, -z+2/3  | 2.99(4)  | 3.462(8)  | 108(3)  |
| C(28) - H(28)···O(2)   | -x+1, -y, -z+1          | 2.49(8)  | 3.302(9)  | 161(5)  |
| C(11) - H(11)···O(2')  | x, y, z-1               | 2.61(7)  | 3.30(2)   | 130(5)  |
| C(28) - H(28)···O(2')  | -x+1, -y, -z+1          | 2.95(7)  | 3.53(4)   | 128(4)  |
| C(21) - H(21)···O(4B)  | -x+y+4/3, -x+2/3, z-1/3 | 2.92(6)  | 3.65(3)   | 134(3)  |
| C(26) - H(26)···O(4B)  | -x+y+4/3, -x+2/3, z-1/3 | 2.09(6)  | 3.11(2)   | 164(4)  |
| C(26) - H(26)···O(6)   | -y+2/3, x-y-2/3, z+1/3  | 2.74(5)  | 3.452(9)  | 126(3)  |
| O(1) - H(1')···S(1)    |                         | 2.50(17) | 3.014(7)  | 119(7)  |
| O(5) - H(5)···S(3)     |                         | 2.6(2)   | 2.982(5)  | 125(12) |
| O(1) - H(1)···S(4)     |                         | 2.42(11) | 2.993(10) | 117(7)  |
| O(1) - H(1')···O(3)    |                         | 2.24(16) | 2.893(9)  | 151(7)  |
| O(1) - H(1)···O(7)     |                         | 2.04(13) | 2.922(7)  | 148(8)  |
| O(5) - H(5)···O(7)     |                         | 2.3(2)   | 2.942(7)  | 149(12) |

**Table S10** Hydrogen bonds of compound **10·H<sub>2</sub>O**

| Atoms involved D-H···A | Symmetry                | H···A    | D···A    | <(DHA)   |
|------------------------|-------------------------|----------|----------|----------|
| C(11) - H(11)···O(1)   | 1-y, x-y, z             | 2.852(3) | 3.693(8) | 151.2(3) |
| C(36) - H(36)···O(8)   | y+2/3, -x+y+1/3, -z+1/3 | 2.735(1) | 3.657(6) | 170.0(3) |
| O(7) - H(7)···S(1)     |                         | 2.51(6)  | 3.034(3) | 122.8(4) |
| O(3) - H(3)···S(3)     |                         | 2.644(4) | 3.080(3) | 114.9(3) |
| O(7) - H(7)···O(2)     |                         | 2.04(5)  | 2.725(4) | 140.9(2) |
| O(3) - H(3)···O(6)     |                         | 1.92(1)  | 2.663(4) | 150.7(5) |

**Table S11** Hydrogen bonds of compound **11**

| Atoms involved D-H···A  | Symmetry                | H···A   | D···A     | <(DHA)    |
|-------------------------|-------------------------|---------|-----------|-----------|
| C(28) - H(28B)···S(2)   | x, y, z+1               | 3.06(5) | 4.006(4)  | 165.4(6)  |
| C(28') - H(28D)···S(2') | x, y, z+1               | 3.01(5) | 3.885(6)  | 150.4(3)  |
| C(10) - H(10)···S(4')   | x, y, -1+z              | 3.04(5) | 3.500(5)  | 112.0(3)  |
| C(28') - H(28D)···S(4') |                         | 2.59(1) | 3.203(6)  | 121.2(4)  |
| C(3) - H(3A)···O(2)     | -x+y+1/3, -x+5/3, z-1/3 | 2.53(1) | 3.233(4)  | 143.8(2)  |
| C(7) - H(7)···O(2)      | -y+5/3, x-y+4/3, z+1/3  | 2.53(1) | 3,133(4)  | 122.5(4)  |
| C(12) - H(12)···O(2)    | -x+y+1/3, -x+5/3, z-1/3 | 2.75(2) | 3,644(4)  | 168.2(1)  |
| C(14) - H(14)···O(2)    | -y+5/3, x-y+4/3, z-2/3  | 2.90(1) | 3,490(4)  | 122.5(3)  |
| C(5) - H(5)···O(4)      | x, y, z+1               | 2.82(1) | 3,702(5)  | 159.2(3)  |
| C(10) - H(10)···O(4)    | -x+4/3, -y+5/3, -z+2/3  | 2.63(1) | 3.310(4)  | 130.9(1)  |
| C(26) - H(26)···O(4)    | x, y, z+1               | 2.91(1) | 3.778(6)  | 155.1(5)  |
| C(26) - H(26)···O(5)    | -x+4/3, -y+5/3, -z+5/3  | 2.73(1) | 3.539(7)  | 145.8(3)  |
| C(29) - H(29A)···O(6)   | y, -x+y+1, -z+2         | 2.54(1) | 3.174(13) | 122.9(2)  |
| C(17') - H(17')···O(6') | y, -x+y+1, -z+1         | 2.43    | 3.34(8)   | 165.5(6)  |
| O(3) - H(3)···S(1)      |                         | 2.54(2) | 3.030(3)  | 119.8(2)  |
| O(5) - H(5A)···S(2)     |                         | 2.57(1) | 3.072(5)  | 120.7(4)  |
| O(1) - H(1)···S(4)      |                         | 2.52(1) | 3.000(2)  | 118.7 (1) |
| O(1) - H(1)···S(4')     |                         | 2.48(1) | 3.041(4)  | 126.7 (2) |
| O(3) - H(3)···O(1)      |                         | 2.36    | 2.919(3)  | 126.5(1)  |
| O(5) - H(5A)···O(4)     | -x+4/3, -y+5/3, -z+2/3  | 2.02    | 2.690(5)  | 138.2(5)  |
| O(5') - H(5')···O(4)    | -x+4/3, -y+5/3, -z+2/3  | 2.58    | 2.99(1)   | 112.9(5)  |
| O(1) - H(1)···O(7)      |                         | 2.19    | 2.985(6)  | 163.6(3)  |
| O(1) - H(1)···O(7')     |                         | 2.28    | 3.040(16) | 155.0(1)  |

**Table S12** Hydrogen bonds of compound **12·CHCl<sub>3</sub>**

| Atoms involved D - H···A | Symmetry | H···A | D···A    | <(DHA) |
|--------------------------|----------|-------|----------|--------|
| O(2) - H(2)···S(2)       |          | 2.61  | 3.059(7) | 114.8  |
| O(2) - H(2)···O(1)       |          | 2.31  | 2.810(8) | 119.6  |

**Table S13** The Cl···Cl interactions of compound **12·CHCl<sub>3</sub>**

|                               | Symmetry     | $d(\text{Cl}\cdots\text{Cl})/\text{\AA}$ | $d(\text{C}\cdots\text{Cl})/\text{\AA}$ | $\theta_1 = \theta_2(^{\circ})$ |
|-------------------------------|--------------|------------------------------------------|-----------------------------------------|---------------------------------|
| C(17) - Cl(2)···Cl(2) - C(17) | 1-x, 2-y, -z | 2.921                                    | 4.492                                   | 151.43                          |

**Table S14** The cyano···Cl interactions of compound **12·CHCl<sub>3</sub>**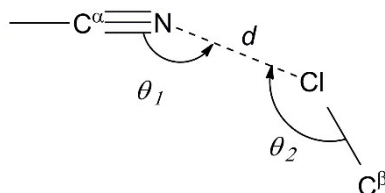

|                                                                        | Symmetry    | $d(\text{N}\cdots\text{Cl})/\text{\AA}$ | $d(\text{C}^{\alpha}\cdots\text{Cl})/\text{\AA}$ | $d(\text{C}^{\beta}\cdots\text{N})/\text{\AA}$ | $\theta_1(^{\circ})$ | $\theta_2(^{\circ})$ |
|------------------------------------------------------------------------|-------------|-----------------------------------------|--------------------------------------------------|------------------------------------------------|----------------------|----------------------|
| $\text{C}^{\alpha} - \text{N}(1)\cdots\text{Cl}(3) - \text{C}^{\beta}$ | x-y, x, 2-z | 2.779                                   | 3.786                                            | 4.285                                          | 147.94               | 149.85               |

**Table S15** The Cl··· $\pi$  interactions of compound **12·CHCl<sub>3</sub>**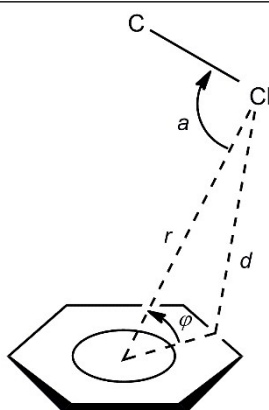

| C - Cl···Cg           | Symmetry         | $r/\text{\AA}$ | $d/\text{\AA}$ | $\alpha(^{\circ})$ | $\phi(^{\circ})$ |       |
|-----------------------|------------------|----------------|----------------|--------------------|------------------|-------|
| C(17) - Cl(1)···Cg(1) | y, 1-x+y, 1-z    | 3.403(6)       | C(1) - C(6)    | 3.470              | 104.52(12)       | 83.20 |
| C(17) - Cl(1)···Cg(2) | x, 1+x-y, -1/2+z | 3.928(3)       | C(7)           | 3.448              | 106.87(10)       | 60.14 |

**Table S16** Sums of the van der Waals radii (vdW) of C and phenyl ring with common lp-containing atoms (atom LP)<sup>S2</sup>

| Atom LP                   | vdW radii/ Å | vdW(LP) + vdW(C <sup>a</sup> )/ Å | vdW(LP) + vdW(Phenyl ring)/ Å |
|---------------------------|--------------|-----------------------------------|-------------------------------|
| H                         | 1.20         | 2.90                              | 3.05                          |
| O                         | 1.52         | 3.22                              | 3.37                          |
| Cl                        | 1.75         | 3.40                              | 3.45                          |
| S                         | 1.80         | 3.50                              | 3.65                          |
| N                         | 1.55         |                                   |                               |
| C <sup>a</sup>            | 1.70         |                                   |                               |
| Phenyl ring <sup>S3</sup> | 1.85         |                                   |                               |

### Reference

S2 Bondi, *J. Phys. Chem.*, 1964, 68, 441–451.

S3 F. Malone, C. M. Murray, M. H. Charlton, R. Docherty and J. Lavery, *J. Chem. Soc., Faraday Trans*, 1997, 93, 3429–3436.



**Table S17** The partial site occupation factors of four compounds

| Compound                  | Split atoms                                             | Occupation factors  |
|---------------------------|---------------------------------------------------------|---------------------|
| <b>7·CHCl<sub>3</sub></b> | C(26)-C(31), S(3), O(4)/C(26')-C(31'), S(3'), O(4')     | 0.859(16)/0.141(16) |
| <b>8</b>                  | C(14)-C(16)/C(14')-C(16')                               | 0.826(8)/0.174(8)   |
| <b>9</b>                  | C(15)-C(17)/C(15')-C(17')                               | 0.57/0.43           |
|                           | C(32)-C(34)/C(32')-C(34')                               | 0.66/0.34           |
|                           | C(14)/C(14B)                                            | 0.75/0.25           |
|                           | O(4), O(4A)/O(4B),                                      | 0.375, 0.375/0.25   |
|                           | O(2)/O(2')                                              | 0.69/0.31           |
|                           | O(6)/O(6')                                              | 0.78/0.22           |
| <b>11</b>                 | C(15)-C(30), S(2), S(3), S(4), O(5), O(6), O(7)/        | 0.707(3)/0.293(3)   |
|                           | C(15')-C(30'), S(2'), S(3'), S(4'), O(5'), O(6'), O(7') |                     |
